# Supplementary material
Source: PubMed Central journal article supplement (PMC8563185)
Supplement: ciaa949_suppl_supplementary_materials.pdf [file ciaa949_suppl_supplementary_materials.pdf]

**Supplemental Materials:**

- **Page 1: Supplemental Table 1**
- **Page 2: Supplemental Figures 1-2**
- **Page 3: Supplemental Figure 3**

**Supplemental Table 1:** Predictors of receipt of follow-up anti-HCV testing at age  $\geq 18$  months among 696 exposed infants with negative HCV-RNA testing at age 2-6 months

|                                                                                               | N   | Follow-up anti-HCV testing completed at age $\geq 18$ months |                  | P <sup>b</sup> |
|-----------------------------------------------------------------------------------------------|-----|--------------------------------------------------------------|------------------|----------------|
|                                                                                               |     | Yes <sup>a</sup>                                             | No <sup>a</sup>  |                |
| Maternal age at delivery (years, median [IQR])                                                | 679 | 27.3 [24.6-30.1]                                             | 27.2 [24.6-31.0] | 0.816          |
| Maternal race/ethnicity                                                                       | 681 |                                                              |                  | 0.462          |
| -White                                                                                        |     | 89% (196/221)                                                | 89% (410/460)    |                |
| -Black                                                                                        |     | 5% (11/221)                                                  | 3% (13/460)      |                |
| -Hispanic                                                                                     |     | 1% (2/221)                                                   | 1% (6/460)       |                |
| -Other                                                                                        |     | 5% (12/221)                                                  | 7% (31/460)      |                |
| Maternal education                                                                            | 650 |                                                              |                  | 0.538          |
| -completed high school or equivalent                                                          |     | 67% (140/209)                                                | 69% (306/441)    |                |
| Maternal viremia reported to ODH within 1 year prior to delivery or 90 days months postpartum | 650 | 48% (102/213)                                                | 51% (222/437)    | 0.486          |
| Infant age at 2-6 month visit for HCV-RNA test (months, median [IQR])                         | 696 | 3.2 [2.7-4.0]                                                | 3.4 [2.9-4.2]    | 0.078          |
| Infant in foster care at 2-6 month visit                                                      | 696 | 30% (67/226)                                                 | 27% (128/470)    | 0.507          |
| Infant insurance status at 2-6 month visit                                                    | 696 |                                                              |                  | 0.543          |
| -Medicaid                                                                                     |     | 91% (206/226)                                                | 91% (427/470)    |                |
| -Commercial                                                                                   |     | 8% (17/226)                                                  | 6% (29/470)      |                |
| -None/self-pay                                                                                |     | 1% (2/226)                                                   | 2% (10/470)      |                |
| HCV-RNA testing ordered by infectious disease program                                         | 696 | 72% (163/226)                                                | 62% (292/470)    | 0.009          |
| Proximity of county of residence to NCH at time of 2-6 month visit (miles, median [IQR])      | 696 | 6.1 [6.1-29.9]                                               | 24.3 [6.1-46.1]  | <0.001         |

<sup>a</sup>columns contain median [IQR] for continuous variables and frequency for categorical variables

<sup>b</sup>P values reflect Mann-Whitney U tests for continuous variables and chi-square tests for categorical variables.

Abbreviations: HCV, hepatitis C virus; IQR, interquartile range; ODH, Ohio Department of Health; NCH, Nationwide Children's Hospital

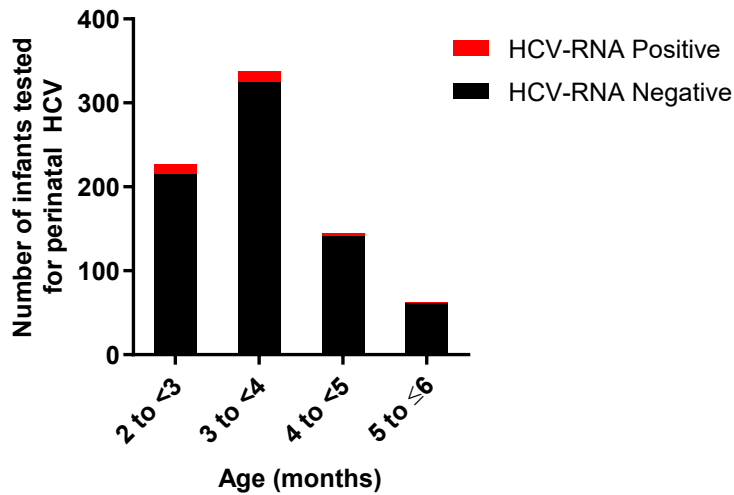

**Supplemental Figure 1:**

Age distribution of 770 perinatally-exposed infants at time of initial 2-6 month HCV-RNA RT-PCR testing. Infants with a positive test are indicated (red).

Abbreviations: HCV, hepatitis C virus; RT-PCR, reverse transcription polymerase chain reaction

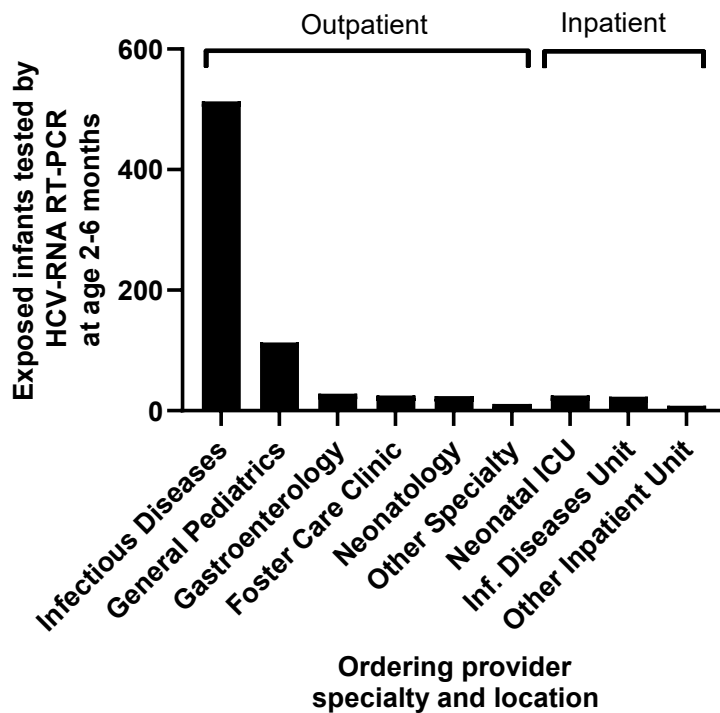

**Supplemental Figure 2:**

Medical specialty and location (inpatient versus outpatient) of ordering provider for HCV-RNA tests in exposed infants

Abbreviations: HCV, hepatitis C virus; RT-PCR, reverse transcription polymerase chain reaction

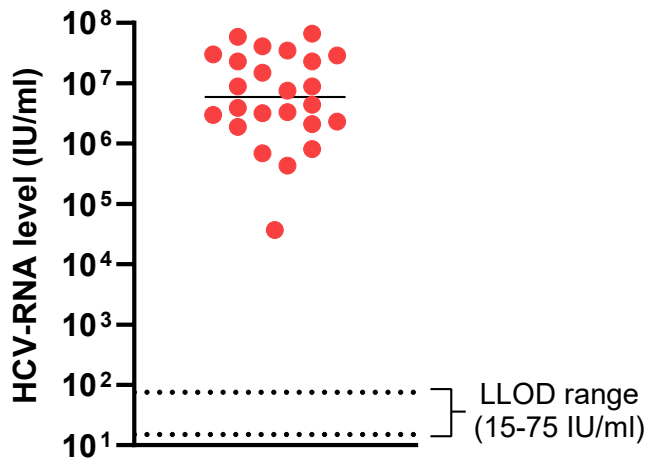

**Supplemental Figure 3:** HCV-RNA levels in 24 infants with positive quantitative HCV-RNA RT-PCR results when first tested at age 2-6 months. Infants tested with a qualitative RT-PCR assay (n=4) are excluded.

Abbreviations: HCV, hepatitis C virus; RT-PCR, reverse transcription polymerase chain reaction; LLOD, lower limit of detection
